# Supplementary material for: Characterization of a randomized FRET library for protease specificity determination
Source: Royal Society of Chemistry journal article supplement (doi:10.1039/b709290c), 2008-06-06
Supplement: b709290c.pdf [file b709290c.pdf]

ELECTRONIC SUPPLEMENTARY INFORMATION (ESI)

**Characterization of a Randomized FRET Library for Protease  
Specificity Determination.**

Jonathan F. Fretwell<sup>1</sup>, Shams M. K. Ismail<sup>2</sup>, and Thomas L. Selby<sup>\*1</sup>

<sup>1</sup>Department of Chemistry, The University of Central Florida, Orlando, Florida 32816

<sup>2</sup>Immunogenetics Department, Human Genetics and Genome Research Division,  
National Research Center, Cairo, Egypt.

\*Corresponding author address: Thomas L. Selby; 4000 Central Florida Blvd, Orlando,  
Fl 32816-2366, Telephone: (407) 823-6752, FAX: (407) 823-2252, [tselby@mail.ucf.edu](mailto:t.selby@mail.ucf.edu)

## Linker Sequence

TGTTCATGGAATTTGTGCTTTGCTCC  
 GTATCATGATTAATTTCTCAAGAAAGA  
 CCCGGGAGATTTAGTCAAATGACTCGG  
 TTGATATTATCGGCGTTACGGATGTG  
 TATGTACGAAAAAAGAAATGGTTTGT  
 TTGACAACATTTTAGGAGGAGAAAGGC  
 AATACAAAATTTCTAAGTATCTCAAGC  
 CAAATAGGCAATTTCTAAACTTTTAAA  
 AGCCCTACAGAAATACCAGAACCATT  
 ACTAACCGGATACAGCTAATGGTGAAC  
 AAGAACATTCCTCATTTGTATGGCAATA  
 GGATCTGAAGAAGTCCAGGGTGGATG  
 AGTCGTAATTTATAGCTTCCAGCTGCAG  
 GGTGTACGGGGTGGTCTTATATGC  
 ATCACTGTCTTGTCTGCCCTGAAAGAAG  
 GTAGAATGGAGGGATTTGGTTCATCTAC  
 TTGTGGACAGCACACAGGCAAGACTA  
 TGGGCTATTCAATCCCTGCCCTGAAAT  
 CGCGAGAGGTACCTACATTGCCACTTG  
 GGCTATGGTCTATGTAAGGCCATCTCG  
 CAATTTGTTAAGGAGGCAACCGGTACC  
 GGCTATGGTCTATGTAAGGCCATCTCG  
 CAGTACCCGATTGATTGTATATTTACC  
 AAAGTCCATATATCTCGGCAGGTTTCAG  
 GTTTGGACTAAGCAGCGCCATTTCTAT  
 TTTCTAAATCCCGCGTCTCTTATCAT  
 TTTCAATTCGCGCGGTTCTTATGTAA  
 AATATTCGATTCCGGTTCAGCGACCAG  
 GCTATAAAAAGCGTATCTGGGAGTCTT  
 AGTTAAACACGCTACGAAACGATAGAAT  
 CTCTTACCGAAGCAATTCACGCAAGA  
 CGGACGAATTTAAGCCATAAAGACAGT  
 ACTTGGTCTTGGGCGACAGATGTCCGG  
 TAATTATTTAGCAGGTTCTGTCCATG  
 TCTACGATGACGTCAACCGATACCCTT  
 TGCTGGGTAAATCAAATAAATATGAT  
 TGCTGGGTAAATCAAATAAATATGAT  
 AGAAAAAAGTAAAGACTGTCCAGG  
 ACATGTAACCGGTAGCTCATTTGCTAGG  
 ACTATTACCGATTCTTATTTGCTGACT  
 GCTTACGATACAGTTCTTACTTAAAGC  
 ATTGTGTAATGCTAGACATCCGTTTG  
 GAGTCACTATCCGAATCCTTTTAAAGA  
 GATAGGGCTCTTACAGATATCTAACGAA  
 GCCATTAACCAATATCACGCGATAACT  
 GAGTCACTATTCGAATCCTTTTAAAGA  
 TACAAATGGCCCATAGGAGTCAATTTGC  
 TACTCTACGCTTTCCGGTGCCTCCATA  
 CAAACGGGGTGTCTTAACTTGAAC  
 GTTCTACAATTTGCTACGATACACGTG  
 GGGAGACTTCTCAGGGAGGAGTAAA  
 CCAGAACAGTCTAGCCGGGAGCTTAG  
 GCCATAACTTTGGCCCTCCTAAGACTG  
 ACGATCGTGTCTTTTAGTATCATAGTA  
 CAAATAGGCAATTTCTAAACTTTTAAA  
 TTAGCATCTTTTATATGTATTTGCCCG  
 GCACCAACAGAACTACCTCACATTCGC  
 CTAGGCGCTTGGACAGAACCGGAGCGT  
 GCCCTATTTCCGGCATAATCAGAGATGA  
 TTGGAACAACCTTGATCAGATCAACA  
 GAGTGTATACTTGGTATTTGGCCTTGTG  
 TAAAACCTTTATTTGTTTGCATTTACTC  
 TTAAGAAGTAATCGCGTAAACAGACGAG  
 ACCGCAGATCCGGTAAAGCAATCCAT  
 TTTATGCGACGTTACGCCCTCTGATACA  
 TGGCGAATCCAGAATAAGACGATATAA  
 TAATCTGCCTCTGATTGTAACCTATAA  
 CAGGCAGATGAATCAGAATGTCCACTC  
 TGTAACTTAGAATGCGTCAACAAATAA  
 CATATAGTGTCTTACACAATGTAGTA  
 GGAGCAAAGCACAAATTCATGTAAACA  
 CCGAGTCAATTTGACTAAATCTCCCGGG  
 ACAAACTTCTTTTTCGATACATA  
 GCTTGAAGATACCTAGAATTTGTATT  
 TTTAAAAGTTAGAAATTTGCCATTTTG  
 CATCCACCCTGGGACTTCTTCAGATCC  
 GTAGATGACCCAATCCCTCCATTTCTAC  
 ATTTACAGGCGAGGATTTGAATAGCCCA

## Protein Sequence

CYMEFVLCS  
**VS\*LI SQER**  
 PGRFSQMTR  
 LILSAVTDV  
 YVRKKRMVC  
**L TTF\*EEKG**  
**N TKF\*VSSS**  
**Q IGNF\*TFK**  
 SPTEIPEPF  
 TNAIQLMVN  
 KNIPHCMAI  
 GSEEVPGWM  
 SRNYSFQLQ  
 GVRGWSLIC  
**I TVLLP\*KK**  
 VEWRDWVIY  
 LWTAHEARL  
**W AIQSLP\*N**  
 RERYLHCHL  
 GYGLCKAIS  
 QLFKEANGT  
 GYGLCKAIS  
 QYPIDCIFT  
 KVHISRQVQ  
 VWTQKRFHY  
 FLNFPSPYH  
**F QFRAVLM\***  
 NIRFRFSDQ  
 AIKSVSGSL  
**S \*TRYER\*N**  
 LLTEAIHAR  
 RTNLSHKDS  
 TWSWATRCR  
**\*L FSRFLSM**  
 STMTSTDTL  
 CWVNQNKYD  
 CWVNQNKYD  
 RKSKDCPR  
**TCNA\*LIAR**  
 TITDSYCLT  
 AYDTVLYLS  
 IVVMLDIRL  
 ESLFRILLR  
 DRALQISNE  
 AINQYHAIT  
 ESLFRILLR  
 YNGPIGVIC  
 YSTLSGASI  
 QTGCFLTLN  
 VLQFATHV  
 GRLLREEDK  
**PEQSSPGA\***  
 AHNFGLLRL  
 TIVLFSIIV  
**Q IGNF\*TFK**  
 LASFMYCYP  
 APTELPHIR  
 LGAWTERER  
**ALFRHNQR\***  
 LETTLIRST  
 ECILGIGLV  
**\*NFICLHLL**  
 LRSNRVTDE  
 TARSGKQIH  
 FMRRYASDT  
**W RIQNKTI\***  
**\*SASDCNL\***  
 QADESECP  
**CNLECVNK\***  
 HIVFLHNVV  
 GAKHKFHV  
 PSHLTKSPG  
 TNHSFFSYI  
**A \*RYLEFCI**  
 FKSLEIAYL  
 HPPWDFFRS  
 VDDPIPPFY  
 ISGQGLNSP

**Table 1.** List of initial sequences in the randomized region from the first set of plasmids analyzed from the library. The corresponding amino acids for each region is also given based on the in-frame translation of the DNA in the cassette region (see Figure 2 in the text). This list was used to construct Table 1 in the main text. Stop codons are denoted using \* and are colored in red to highlight the number of stop codons that were found in this initial set. Each of the colonies containing these plasmids turned green as described in the main text and as shown in Supplemental figure 1.

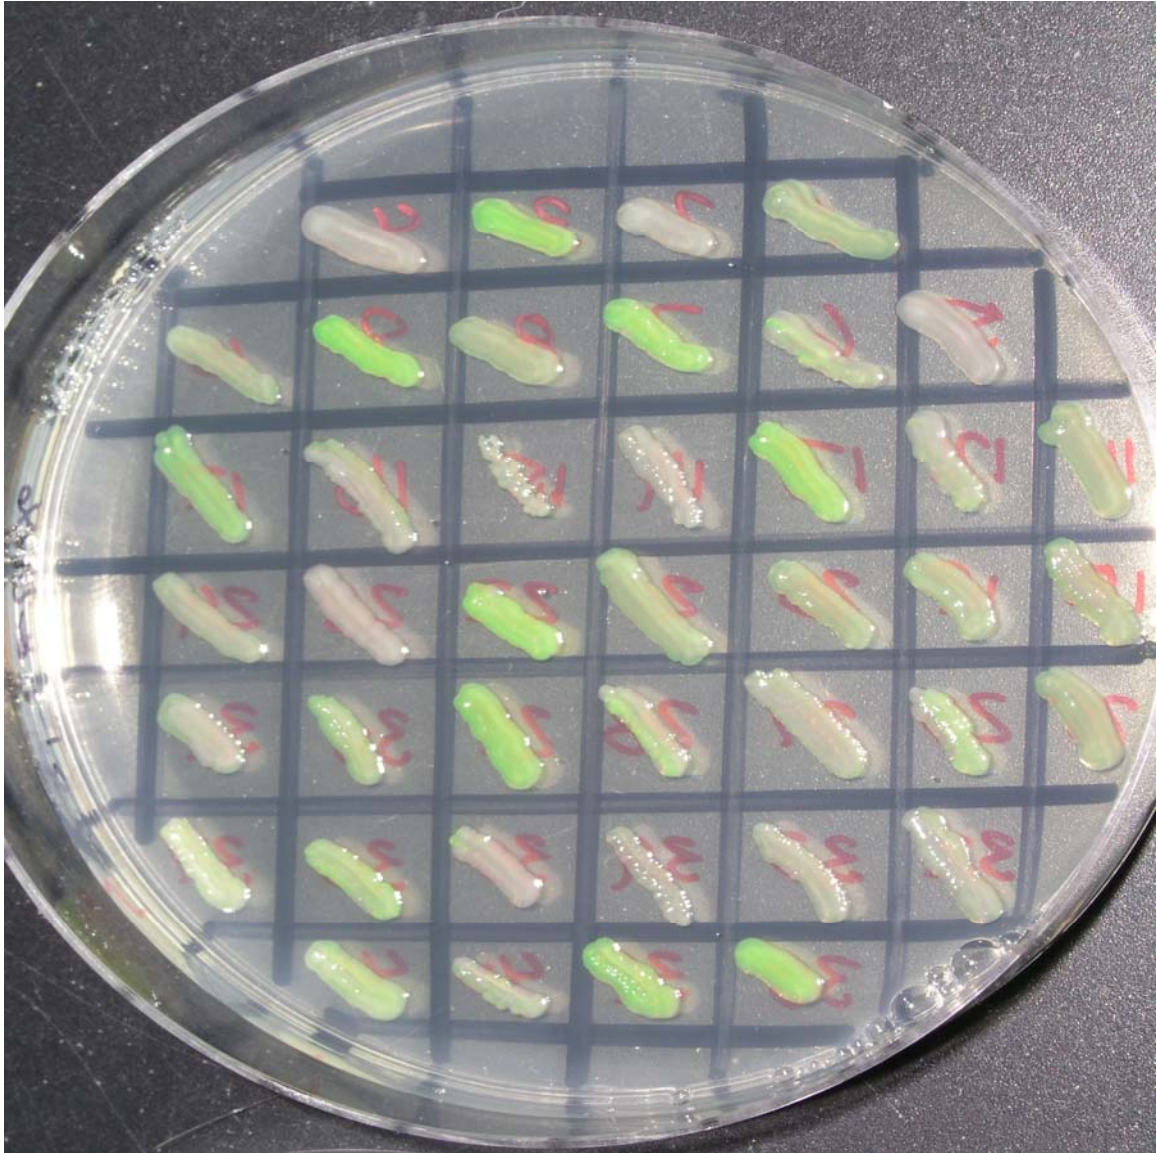

**Figure 1.** Example of the plate showing the green *E. coli* colonies for those cells that contain plasmids with stop codons in the randomized linker region. The cell line used was Novablue(DE3) and incubation was performed for two days, with day 1 at 37 °C and day 2 at room temperature. This image was captured with plain light (no UV irradiation) on a standard bench top with nothing added to the plate to increase the green color intensity. The darker green colonies, numbered from right to left, then down are # 3, 7, 9, 13, 17, 22, 29, 36, 38, and 39, which correspond to the first ten sequences shown in red in Supplementary Table 1 containing stop codons. Longer incubation periods will yield additional green colonies that turn a slight orange color after 1 week at room temperature. This screening step (initial green colony elimination) is now used to eliminate colonies that would not yield useful fusion proteins and are eliminated from the library.
